# Supplementary material for: Significance of body temperature in elderly patients with sepsis
Source: Springer Nature journal article supplement (doi:10.1186/s13054-020-02976-6), 2020-06-30
Supplement: MOESM3 [file 18133346]

**Figure S2.** Associations between the body temperature <36.0 °C and 90-day in-hospital mortality using different age cut-offs.

**a. 65 years cut-off**

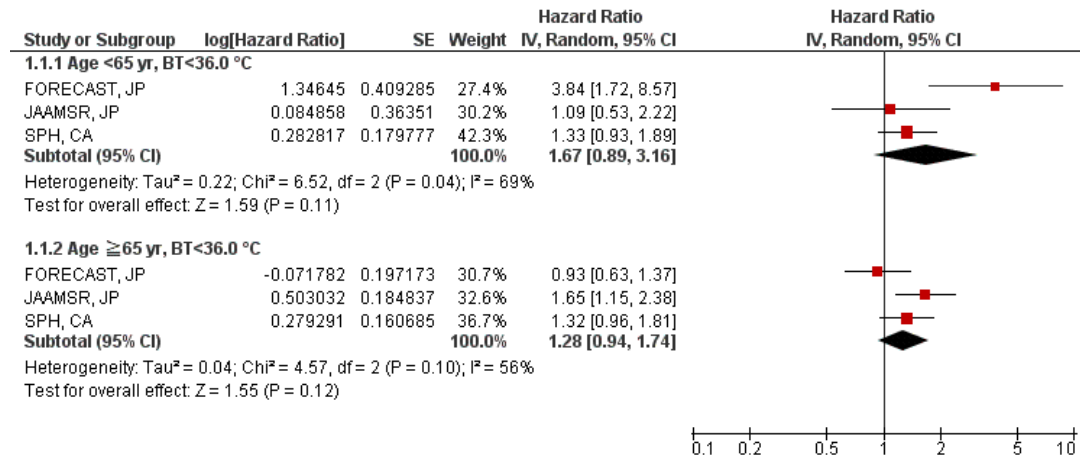

**b. 70 years cut-off**

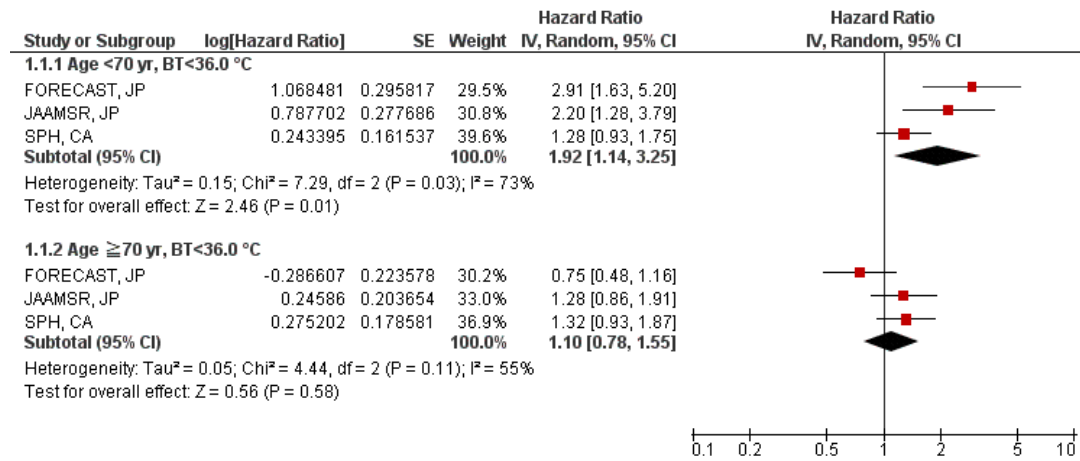

**c. 80 years cut-off**

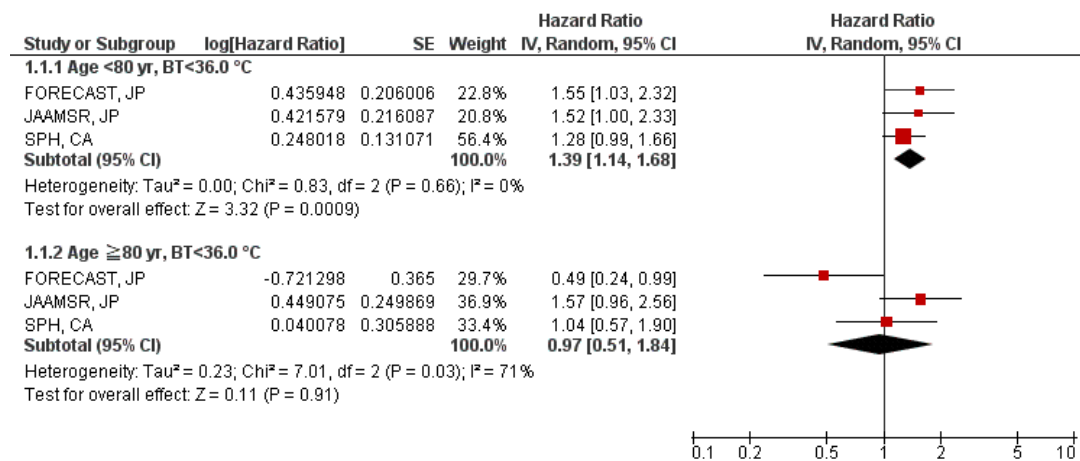

The age cut-off of 70 and 80 years revealed similar results to those observed in the primary analysis. However, the effect of hypothermia was eliminated using a cut-off of 65 years.

JP, Japan; CA, Canada; CI, confidence interval.

The hazard ratio from each cohort was calculated with adjusting the potentially confounding factors such as the age, sex, chronic steroid use, and acute physiology and chronic health evaluation (APACHE) II score.
