# Supplementary material for: Significance of body temperature in elderly patients with sepsis
Source: Springer Nature journal article supplement (doi:10.1186/s13054-020-02976-6), 2020-06-30
Supplement: MOESM4 [file 18133346]

**Figure S3.** Probability of mortality corresponding to the body temperature category of  $>38.3\text{ }^{\circ}\text{C}$

**a. Discovery cohort (FORECAST cohort)**

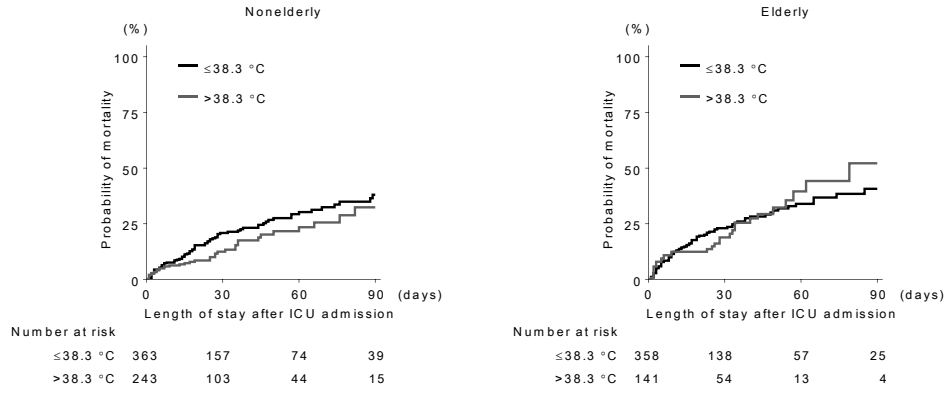

**b. Validation cohort 1 (JAAMSR cohort)**

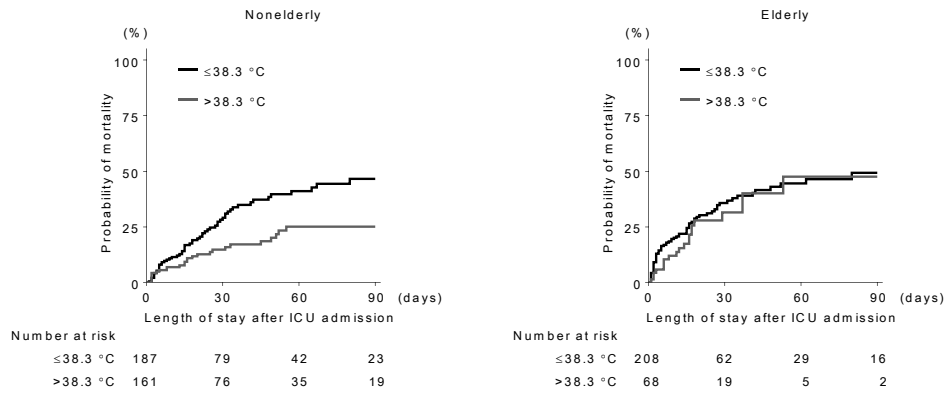

**c. Validation cohort 2 (SPH cohort)**

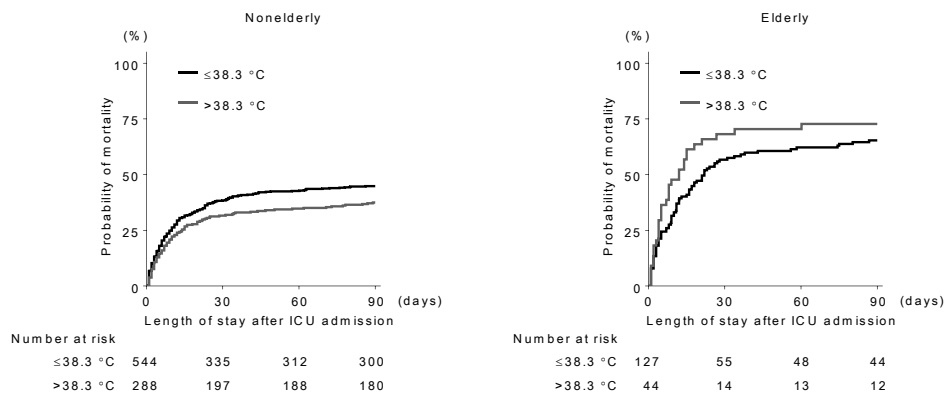

Nonelderly patients with fever had lower mortality in all three cohorts.
